# Supplementary material for: Effectiveness of Augmentative Biological Control of Streptomyces griseorubens UAE2 Depends on 1-Aminocyclopropane-1-Carboxylic Acid Deaminase Activity against Neoscytalidium dimidiatum
Source: J Fungi (Basel). 2021 Oct 20;7(11):885. doi: 10.3390/jof7110885 (PMC8618148; doi:10.3390/jof7110885)
Supplement: Supplementary file 1 [file jof-07-00885-s001.zip › jof-1416471-supplementary.pdf]

## Supplementary Material

### Effectiveness of Augmentative Biological Control of *Streptomyces griseorubens* UAE2 Depends on 1-Aminocyclopropane-1-Carboxylic Acid Deaminase Activity Against *Neoscytalidium dimidiatum*

Bader M. Al Hamad, Seham M. Al Raish, Gaber Ramadan, Esam E. Saeed, Shaikha S.A. Alameri, Salima S. Al Senaani, Synan F. AbuQamar\*, Khaled A. El-Tarabily \*

\* Correspondence: [sabuqamar@uaeu.ac.ae](mailto:sabuqamar@uaeu.ac.ae) (S.AQ.)  
[ktarabily@uaeu.ac.ae](mailto:ktarabily@uaeu.ac.ae) (K.E.-T.)

**Table S1.** Comparison on the effect of application of polyvalent *Streptomyces* phages and dry heat techniques on isolation plates of cfu of SA and NSA from rhizosphere soils of royal poinciana.

| Actinobacteria | Without phage                        | With phage         | Without heat       | With heat          |
|----------------|--------------------------------------|--------------------|--------------------|--------------------|
|                | $\log_{10}$ cfu g soil <sup>-1</sup> |                    |                    |                    |
| SA             | 7.14±0.63 <i>a</i>                   | 1.85±0.31 <i>b</i> | 6.88±0.41 <i>a</i> | 2.81±0.68 <i>b</i> |
| NSA            | 1.88±0.36 <i>a</i>                   | 5.67±0.41 <i>b</i> | 1.52±0.62 <i>a</i> | 4.78±0.93 <i>b</i> |

Values are means ± SE of 8 replicates. For each method, values (within rows) followed by the same letter are not significantly ( $P>0.05$ ) different according to Duncan's multiple range test. cfu, colony-forming units; SA, streptomycete actinobacteria; NSA, non-streptomycete actinobacteria.

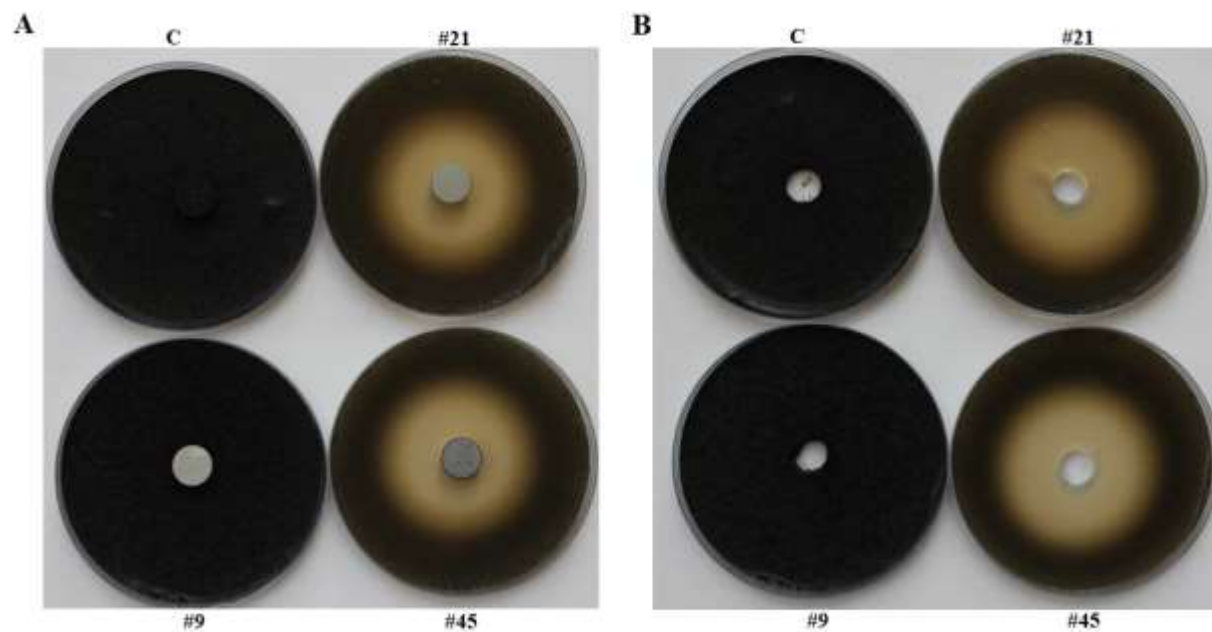

**Figure S1.** *In vitro* effect of BCA candidates on mycelial growth of *Neoscytalidium dimidiatum*. Inhibition of *N. dimidiatum* mycelial growth by the BCAs using (A) cut-plug; and (B) cup plate methods. In (A & B), the diffusible antifungal metabolite-producing isolate #21 and #45 compared to the diffusible antifungal metabolite-non-producing isolate #9 and control. In (B), wells were inoculated with filter-sterilized fish meal extract broth of isolates #21, #45 or #9. Isolates #21 and #45 represent *Streptomyces griseorubens* (BCA3) and *Streptomyces wuyuanensis* (BCA5); respectively. BCA, biological control agent.

**Table S2.** *In vitro* antagonistic activities of the strongest seven BCA candidates showing antagonism to *Neoscytalidium dimidiatum*.

| Activities                                    | Isolate |      |      |       |      |      |      |
|-----------------------------------------------|---------|------|------|-------|------|------|------|
|                                               | +ACCD   |      |      | -ACCD |      |      |      |
|                                               | BCA1    | BCA3 | BCA7 | BCA2  | BCA4 | BCA5 | BCA6 |
| Production of volatile compounds <sup>a</sup> | -       | +    | +    | +     | +    | +    | -    |
| Production of siderophores <sup>b</sup>       | +       | +    | -    | -     | +    | +    | +    |
| Production of hydrogen cyanide <sup>c</sup>   | -       | -    | -    | -     | -    | -    | -    |

<sup>a</sup> + = fungicidal effect; - = no fungicidal effect.

<sup>b</sup> + = produced; - = not produced.

<sup>c</sup> - = not produced.

BCA1, BCA3 (*Streptomyces griseorubens*) and BCA7 represent isolates #4, #21 and #38, respectively.

BCA2, BCA4, BCA5 and BCA6 represent isolates #10, #23, #45 (*Streptomyces wuyuanensis*) and #42, respectively. BCA, biological control agent.

**Table S3.** *In vitro* comparisons of antagonistic activities between the strongest ACCD- producing BCA and the ACCD-non-producing BCA candidates against *Neoscytalidium dimidiatum*.

| Activities                                                                                                                                                                                                                                                                                                                                                                                                                                                                                                                                                                                                                                                                                                                                                                                                                                                                                                                                           | Isolate             |                     |
|------------------------------------------------------------------------------------------------------------------------------------------------------------------------------------------------------------------------------------------------------------------------------------------------------------------------------------------------------------------------------------------------------------------------------------------------------------------------------------------------------------------------------------------------------------------------------------------------------------------------------------------------------------------------------------------------------------------------------------------------------------------------------------------------------------------------------------------------------------------------------------------------------------------------------------------------------|---------------------|---------------------|
|                                                                                                                                                                                                                                                                                                                                                                                                                                                                                                                                                                                                                                                                                                                                                                                                                                                                                                                                                      | BCA3                | BCA5                |
| <b>Production of diffusible metabolites using</b>                                                                                                                                                                                                                                                                                                                                                                                                                                                                                                                                                                                                                                                                                                                                                                                                                                                                                                    |                     |                     |
| cup plate (diameter of inhibition zone in mm)                                                                                                                                                                                                                                                                                                                                                                                                                                                                                                                                                                                                                                                                                                                                                                                                                                                                                                        | 63.90±3.24 <i>a</i> | 65.68±2.34 <i>a</i> |
| <b>Chitinase from</b>                                                                                                                                                                                                                                                                                                                                                                                                                                                                                                                                                                                                                                                                                                                                                                                                                                                                                                                                |                     |                     |
| colloidal chitin (U ml <sup>-1</sup> ) <sup>a</sup>                                                                                                                                                                                                                                                                                                                                                                                                                                                                                                                                                                                                                                                                                                                                                                                                                                                                                                  | 6.06±1.22 <i>a</i>  | 5.84±1.14 <i>a</i>  |
| <i>N. dimidiatum</i> cell-wall (U ml <sup>-1</sup> ) <sup>a</sup>                                                                                                                                                                                                                                                                                                                                                                                                                                                                                                                                                                                                                                                                                                                                                                                                                                                                                    | 4.16±0.62 <i>a</i>  | 4.02±1.05 <i>a</i>  |
| <b>β-1,3-glucanase from</b>                                                                                                                                                                                                                                                                                                                                                                                                                                                                                                                                                                                                                                                                                                                                                                                                                                                                                                                          |                     |                     |
| laminarin (U ml <sup>-1</sup> ) <sup>b</sup>                                                                                                                                                                                                                                                                                                                                                                                                                                                                                                                                                                                                                                                                                                                                                                                                                                                                                                         | 5.08±1.10 <i>a</i>  | 4.94±1.20 <i>a</i>  |
| <i>N. dimidiatum</i> cell-wall (U ml <sup>-1</sup> ) <sup>b</sup>                                                                                                                                                                                                                                                                                                                                                                                                                                                                                                                                                                                                                                                                                                                                                                                                                                                                                    | 2.00±0.38 <i>a</i>  | 1.97±0.16 <i>a</i>  |
| <sup>a</sup> A unit of chitinase was expressed as the amount of the enzyme that released 1 μmol of N-acetyl-D-glucosamine mg <sup>-1</sup> protein h <sup>-1</sup> . This indicates that BCA3 and BCA5 produced high levels of chitinase.<br><sup>b</sup> A unit of β-1,3-glucanase was expressed as the amount of the enzyme that released 1 μmol of glucose mg <sup>-1</sup> protein h <sup>-1</sup> . This indicates that BCA3 and BCA5 produced high levels of β-1,3-glucanase.<br>Values are means±SE from eight replicates. Values with the same letter within a row are not significantly ( <i>P</i> >0.05) different according to Duncan's multiple range test.<br>BCA3 (ACCD-producing isolate #21) and BCA5 (ACCD-non-producing isolate #45) represent <i>Streptomyces griseorubens</i> and <i>Streptomyces wuyuanensis</i> ; respectively.<br>FMEA, fish meal extract agar; CCA, colloidal chitin agar.<br>BCA, biological control agent. |                     |                     |

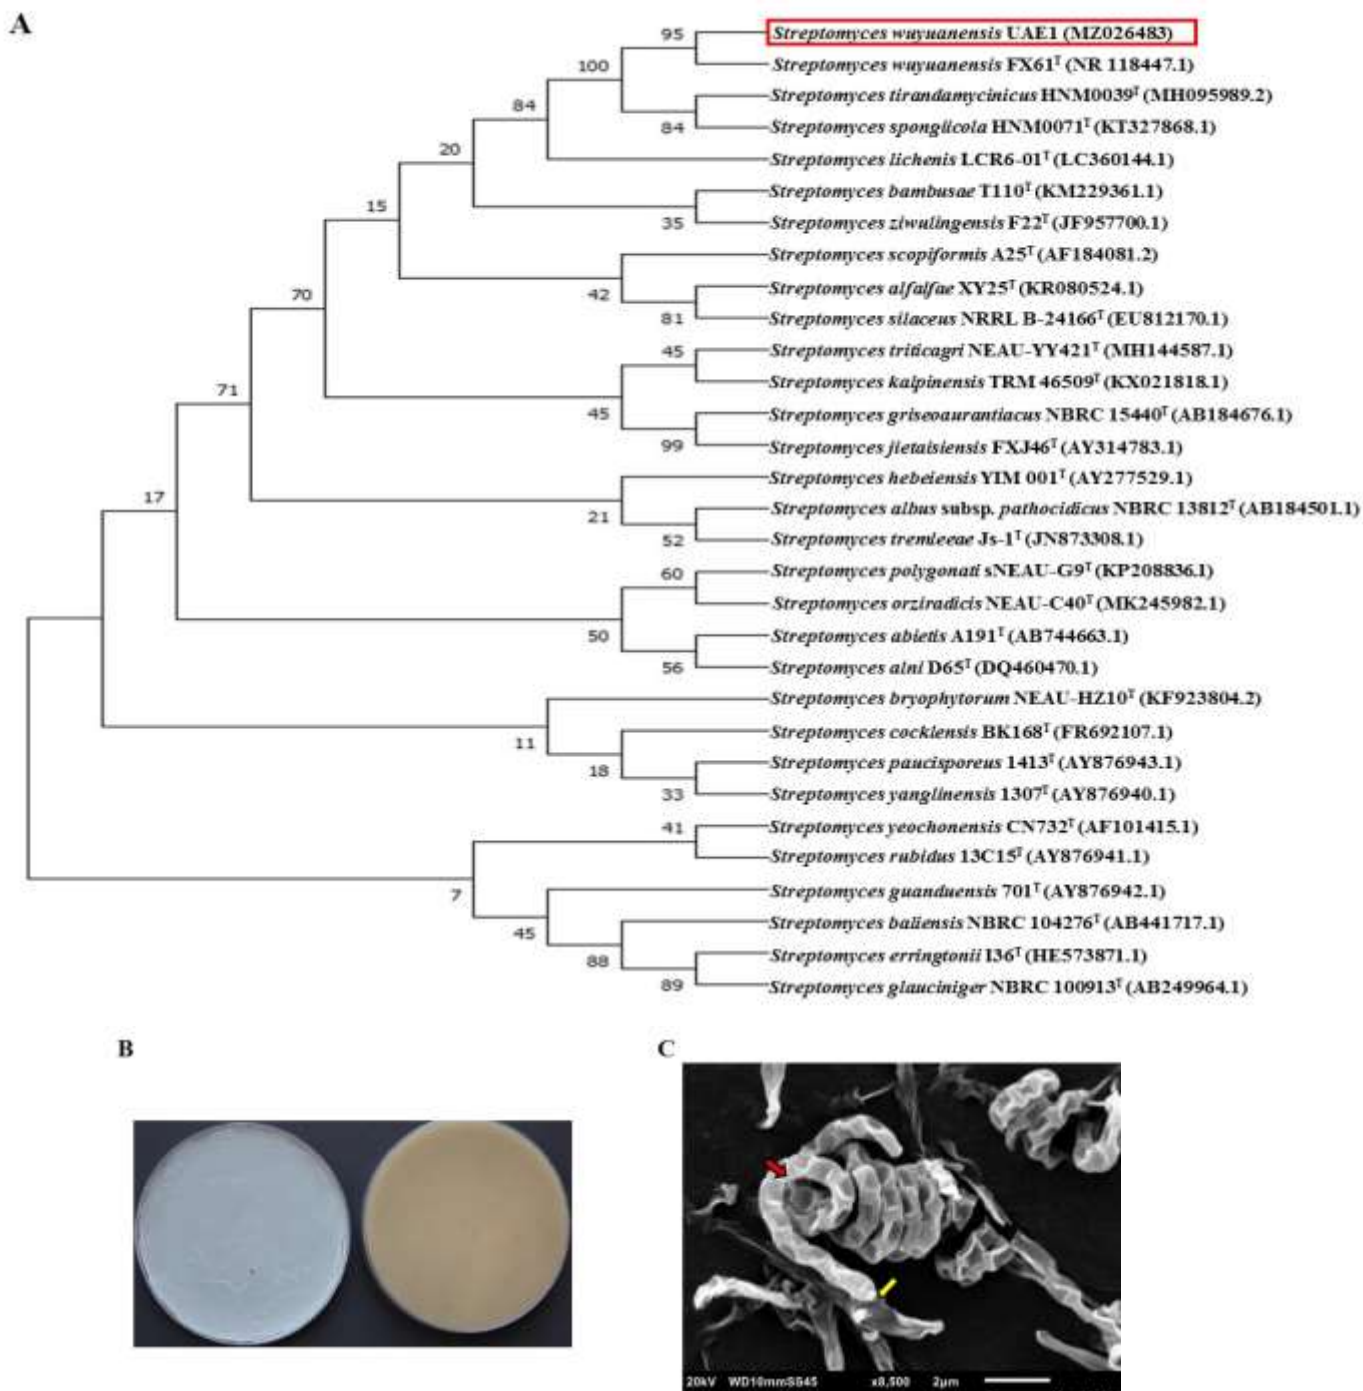

**Figure S2.** Identification of *Streptomyces wuyuanensis* UAE1. (A) The phylogenetic tree showing the relationships between *S. wuyuanensis* UAE1 (BCA5, ACCD-non-producing isolate) (isolate 45; MZ026483; 1,511 bp) and other *Streptomyces* spp. based on 16S rRNA sequences. (B) Gray aerial (left) and yellowish-white substrate (right) mycelia growing on ISP3 medium supplemented with yeast extract. (C) Scanning electron micrograph (8500X) of spirales spore chains (red arrow) and smooth-surfaced spores (yellow arrow) of *S. wuyuanensis* UAE1. In (A), numbers at nodes indicate percentage levels of bootstrap support based on a neighbor-joining analysis of 500 resampled datasets. GenBank accession numbers are given in parentheses. BCA, biological control agent.
